# Supplementary material for: Metabolomics analysis of MnO2 nanosheets CDT for breast cancer cells and mechanism of cytotoxic action
Source: Royal Society of Chemistry journal article supplement (doi:10.1039/d3ra03992g), 2023-01-01
Supplement: d3ra03992g1.pdf [file d3ra03992g1.pdf]

## Supporting Information

### **Metabolomics Analysis of MnO<sub>2</sub> Nanosheets CDT for Breast Cancer Cells and Mechanism of Cytotoxic Action †**

Jian Liu<sup>a</sup>, Changchun Wen<sup>b,\*</sup>, Miaomiao Hu<sup>a</sup>, Juan Long<sup>a</sup>, Jing Zhang<sup>a</sup>, Minzhe Li<sup>a</sup>, Xiang-Cheng Lin<sup>a,\*</sup>

<sup>a</sup>Guangxi Key Laboratory of Information Materials, School of Materials Science and Engineering, Guilin University of Electronic Technology, Guilin 541004, China

<sup>b</sup>State Key Laboratory for the Chemistry and Molecular Engineering of Medicinal Resources, School of Chemistry and Pharmacy Sciences, Guangxi Normal University, Guilin, 541004, China

E-mail: [wcchun@163.com](mailto:wcchun@163.com); [xclin2008@163.com](mailto:xclin2008@163.com).

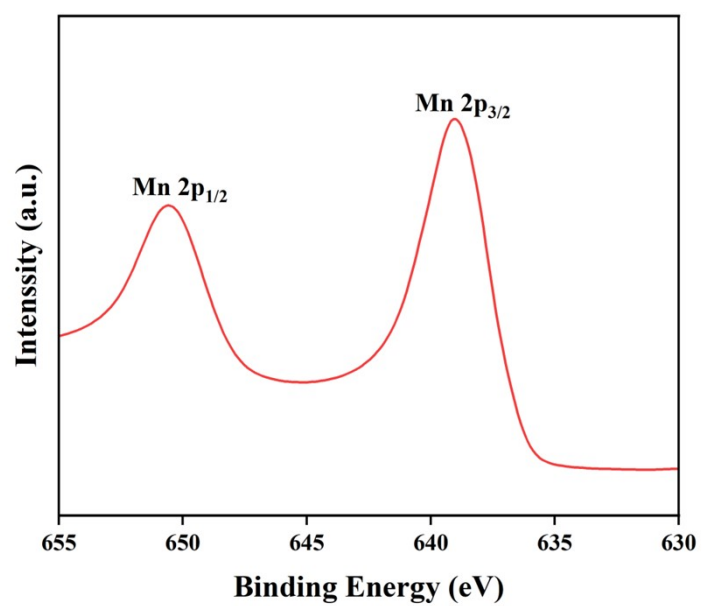

**Fig. S1** XPS survey spectra of MnO<sub>2</sub>NSs.

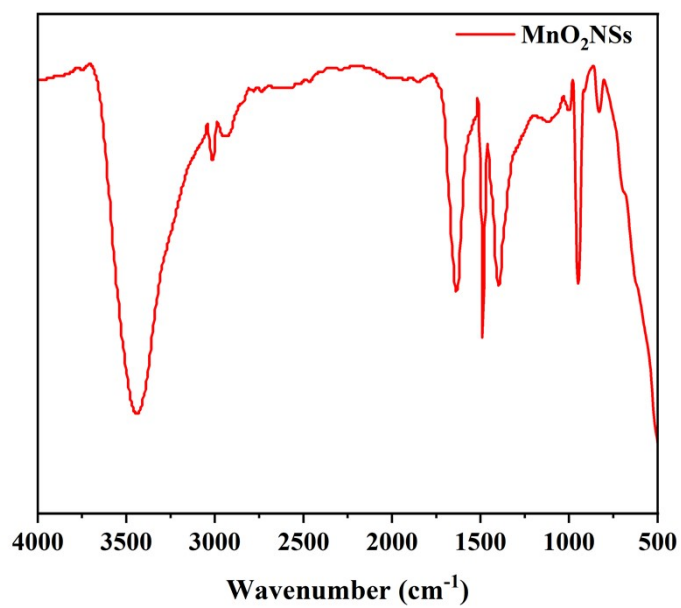

**Fig. S2** FTIR spectroscopy of MnO<sub>2</sub>NSs.
